# Supplementary material
Source: HighWire-hosted journal article supplement (https://bmjopen.bmj.com/content/12/9/e059635)
Supplement: inline-supplementary-material-2 [file inline-supplementary-material-2.pdf]

## Self-Care Tips TO EAT LESS SALT

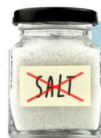

### AVOID HIDDEN SODIUM IN PROCESSED FOODS

Avoid ready-to-eat foods, fast foods, pickled, cured, processed, smoked or salted foods

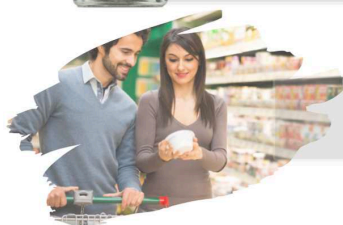

### READ YOUR FOOD LABELS

Look for 'Sodium' in food labels and find out how much sodium each serving contains

### EAT MORE FRESH FOODS

Shop for fresh meats, fish, poultry and fresh or frozen fruits and vegetables

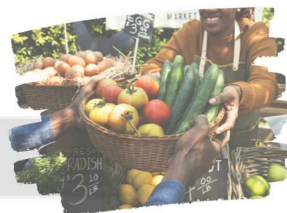

### COOK AND EAT AT HOME MORE OFTEN TO CONTROL SODIUM IN YOUR DIET

Use less salt in your cooking or substitute it with other flavourings or spices

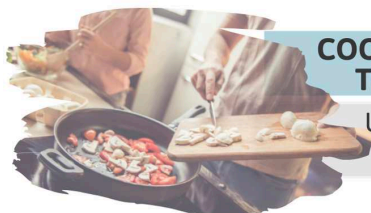

### MAKE HEART-HEALTHY FOOD CHOICES WHEN EATING OUT

Avoid high sodium dishes and fried foods. Keep these tips in mind when you order.

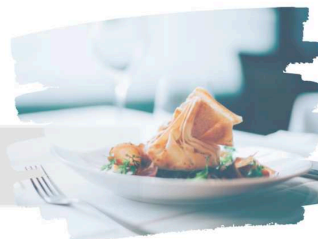

## HEART FAILURE MEDICATIONS

| NAME:                                                  | EXAMPLES:                                                                                                                    | FUNCTION:                                                                                                                                     |
|--------------------------------------------------------|------------------------------------------------------------------------------------------------------------------------------|-----------------------------------------------------------------------------------------------------------------------------------------------|
| <b>ALDOSTERONE ANTAGONISTS</b>                         | <ul style="list-style-type: none"> <li>SPIRONOLACTONE</li> <li>EPLERENONE</li> </ul>                                         | <ul style="list-style-type: none"> <li>Reduce aldosterone levels</li> </ul>                                                                   |
| <b>ANGIOTENSIN CONVERTING ENZYMES (ACE) INHIBITORS</b> | <ul style="list-style-type: none"> <li>RAMIPRIL</li> <li>BENAZEPRIL</li> <li>PERINDOPRIL</li> </ul>                          | <ul style="list-style-type: none"> <li>Expanding blood vessels</li> <li>Controlling blood pressure</li> <li>Reduce burden on heart</li> </ul> |
| <b>ANGIOTENSIN RECEPTOR II BLOCKERS (ARB)</b>          | <ul style="list-style-type: none"> <li>CANDESARTAN</li> <li>IRBESARTAN</li> <li>TELMISARTAN</li> <li>VALSARTAN</li> </ul>    | <ul style="list-style-type: none"> <li>Expanding blood vessels</li> <li>Controlling blood pressure</li> <li>Reduce strain on heart</li> </ul> |
| <b>ANTICOAGULANTS AND ANTIPLATELETS</b>                | <ul style="list-style-type: none"> <li>WARFARIN</li> <li>ASPIRIN</li> <li>TICLOPIDINE</li> <li>HEPARIN</li> </ul>            | <ul style="list-style-type: none"> <li>Increase heart's ability to expand and contract</li> <li>Regulate heart rhythm</li> </ul>              |
| <b>BETA-BLOCKERS</b>                                   | <ul style="list-style-type: none"> <li>CARVEDILOL</li> <li>METOPROLOL</li> <li>ATENOLOL</li> <li>BISOPROLOL</li> </ul>       | <ul style="list-style-type: none"> <li>Expanding blood vessels</li> <li>Controlling blood pressure</li> <li>Reduce strain on heart</li> </ul> |
| <b>DIGITALIS/ DIGOXIN</b>                              | <ul style="list-style-type: none"> <li>LAXOIN</li> <li>NOVODIGOXIN</li> </ul>                                                | <ul style="list-style-type: none"> <li>Increase heart's ability to expand and contract</li> <li>Regulate heart rhythm</li> </ul>              |
| <b>DIURETICS</b>                                       | <ul style="list-style-type: none"> <li>FUROSEMIDE</li> <li>METOLAZONE</li> <li>BUMETANIDE</li> <li>CHLOROTHIAZIDE</li> </ul> | <ul style="list-style-type: none"> <li>Eliminate excess body fluid</li> <li>Reduce shortness of breath, swelling, and bloating</li> </ul>     |
| <b>NITRATES AND VASODILATORS</b>                       | <ul style="list-style-type: none"> <li>NITROGLYCERIN</li> <li>HYDRALAZINE</li> <li>ISORDIL</li> </ul>                        | <ul style="list-style-type: none"> <li>Prevent blood clots</li> <li>Reduce blood pressure</li> </ul>                                          |
